# Supplementary material for: GNSS-based bistatic SAR: a signal processing view
Source: Springer Nature journal article supplement (doi:10.1186/1687-6180-2013-98), 2013-05-06
Supplement: 13634_2012_455_MOESM18_ESM.pdf [file 13634_2012_455_MOESM18_ESM.pdf]

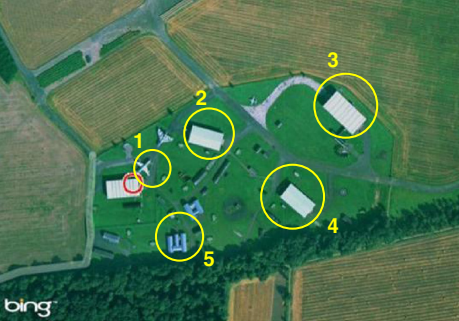

(a)

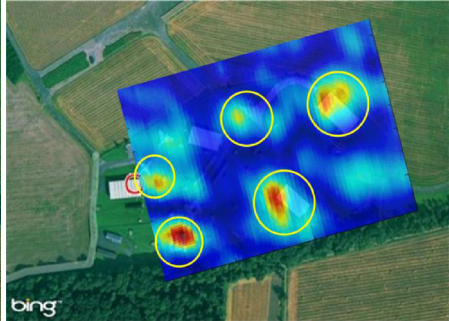

(b)
